# Supplementary material for: Kinematics of ram filter feeding and beat-glide swimming in the northern anchovy Engraulis mordax
Source: Oxford University Press journal article supplement (doi:10.1242/jeb.158337), 2017-01-01
Supplement: jeb158337supp.pdf [file jeb158337supp.pdf]

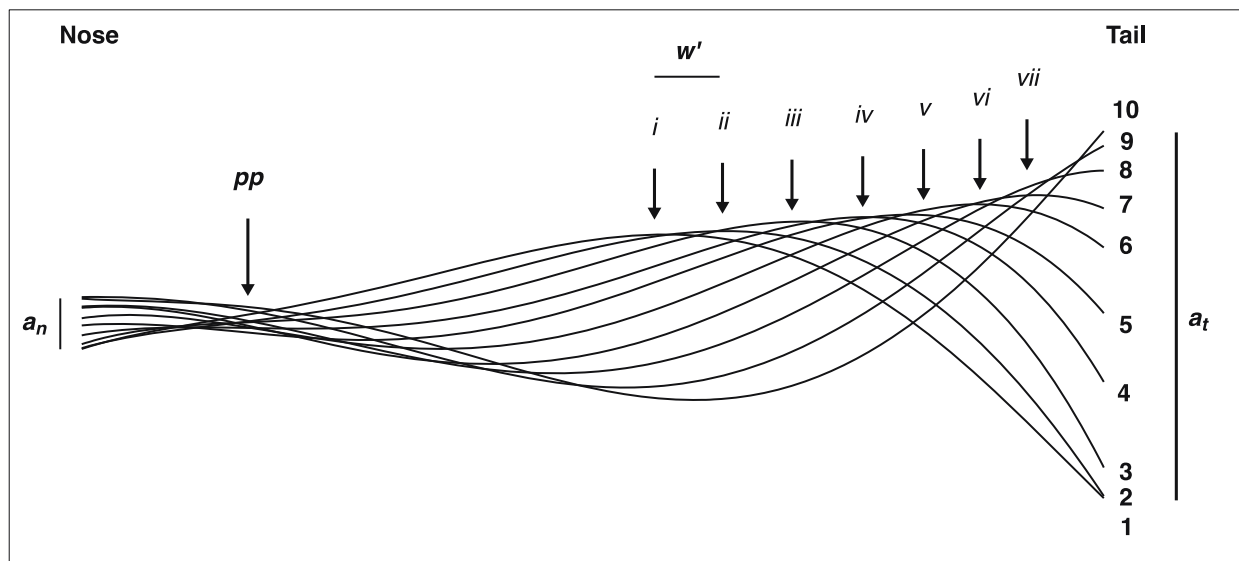

**Fig. S1.**

Midline analysis of ram and beat-glide swimming in *Engraulis mordax*.

After Shadwick and Gemballa (2006). This shows how midline data was analyzed. Lines are constructed midlines (see Methods) over a half stroke cycle from left-most (#1) to right-most (#10) tail extents (not all are shown). Roman numerals *i* – *vii* show the most lateral point of the body for the corresponding number midline (1 – 7). The distances between these ( $w'$ ) were used to calculate the velocity of the propulsive wave ( $w$ ). *pp* is the pivot point, the region of least lateral movement;  $a_t$  is the amplitude at the tail;  $a_n$  is the amplitude at the nose.

**Table S1.** Summary of Pearson correlations to assess pairwise linear dependence between measured parameters as in Fig. 4. Significantly correlations within each swimming mode are highlighted in **bold**, and those which are significant in both swimming modes are additionally **underlined**. **A**, amplitude (**L**);  **$\theta$** , yaw angle ( $^{\circ}$ ); **U**, speed ( $L s^{-1}$ ); **F**, tailbeat frequency ( $str s^{-1}$ ); **Ds**, distance covered per stroke (**L**  $str^{-1}$ ). See Fig. 3 for plots of each relationship.

| <i>Ram filter feeding</i>  |                                                |                            |                                        |                       |
|----------------------------|------------------------------------------------|----------------------------|----------------------------------------|-----------------------|
|                            | <b>A</b>                                       | <b><math>\theta</math></b> | <b>U</b>                               | <b>F</b>              |
| <b><math>\theta</math></b> | <b><math>r = 0.72, P = 0.01</math></b>         |                            |                                        |                       |
| <b>U</b>                   | $r = 0.37, P = 0.24$                           | $r = 0.00, P = 1.00$       |                                        |                       |
| <b>F</b>                   | $r = -0.44, P = 0.15$                          | $r = -0.40, P = 0.20$      | $r = 0.37, P = 0.23$                   |                       |
| <b>Ds</b>                  | <u><b><math>r = 0.76, P = 0.004</math></b></u> | $r = 0.38, P = 0.22$       | <b><math>r = 0.67, P = 0.02</math></b> | $r = -0.42, P = 0.18$ |
| <i>Beat-glide swimming</i> |                                                |                            |                                        |                       |
|                            | <b>A</b>                                       | <b><math>\theta</math></b> | <b>U</b>                               | <b>F</b>              |
| <b><math>\theta</math></b> | $r = 0.09, P = 0.79$                           |                            |                                        |                       |
| <b>U</b>                   | $r = 0.46, P = 0.13$                           | $r = 0.13, P = 0.70$       |                                        |                       |
| <b>F</b>                   | $r = 0.22, P = 0.48$                           | $r = 0.22, P = 0.49$       | <b><math>r = 0.73, P = 0.01</math></b> |                       |
| <b>Ds</b>                  | <u><b><math>r = 0.83, P = 0.003</math></b></u> | $r = 0.40, P = 0.25$       | $r = 0.32, P = 0.36$                   | $r = 0.27, P = 0.45$  |

**Table S2.** Depth calculations

[Click here to Download Table S2](#)
